# Supplementary material
Source: PubMed Central journal article supplement (PMC5731250)
Supplement: NIHMS917454-supplement.pdf [file NIHMS917454-supplement.pdf]

## SUPPLEMENTAL INFORMATION

**Table S1. Related to Table 1. Affinity and selectivity of SR compounds from radioligand binding assays.** To determine selectivity at the opioid receptors, specific competition binding was assessed with ~1 nM <sup>3</sup>H-DAMGO, <sup>3</sup>H-diprenorphine and <sup>3</sup>H-U69,593 in CHO-hMOR, -hDOR and -hKOR membranes, respectively. *See also:* Table 1 for structures, Figure S1 for synthesis of the compounds and Figure S2 for KOR and NOP activity counter-screens.

| Agonist    | Binding affinities ( $K_i$ , nM) |          |         | $K_i$ ratios  |               |
|------------|----------------------------------|----------|---------|---------------|---------------|
|            | hMOR                             | hDOR     | hKOR    | hDOR/<br>hMOR | hKOR/<br>hMOR |
| DAMGO      | 2.1±0.34                         | >10,000  | 989±116 | > 6421        | 475           |
| Morphine   | 6.4±0.72                         | 112±28   | 52±1.0  | 17            | 8             |
| Fentanyl   | 2.8±0.73                         | 2459±850 | 260±55  | 874           | 92            |
| Sufentanil | 0.24±0.07                        | 283±76   | 11±3.3  | 1166          | 44            |
| SR-11501   | 3.0±0.85                         | >10,000  | 13±1.1  | >4794         | 4             |
| SR-14968   | 0.29±0.11                        | >10,000  | 31±4.3  | >55,999       | 108           |
| SR-14969   | 0.86±0.33                        | >10,000  | 33±2.3  | >48,993       | 38            |
| SR-15098   | 14±3.8                           | >10,000  | 146±24  | >3254         | 10            |
| SR-15099   | 11±2.6                           | >10,000  | 110±45  | >2395         | 10            |
| SR-17018   | 11±2.4                           | >10,000  | 68±21   | >3730         | 6             |

**Table S2. Related to Table 1 and Figures 1 and S3. MOR agonist potency and efficacy measures in cell-based assays and in brainstem from mice.** Potencies ( $EC_{50}$ ) and efficacies ( $E_{MAX}$ ) of the SR compounds and several clinically used opioids. Inhibition of forskolin-stimulated cAMP was determined in CHO-hMOR cells,  $^{35}S$ -GTP $\gamma$ S binding was determined in membranes from CHO-mMOR cells or from mouse brainstems and  $\beta$ arrestin2 recruitment was assessed with the imaging based transfluor assay with U2OS- $\beta$ arrestin2-GFP-mMOR cells. Data are presented as mean  $\pm$  S.E.M. of 3 or more assays run in duplicate or triplicate.  $E_{MAX}$  values were calculated relative to DAMGO. See also: Table 1 for potencies and efficacies in the GTP $\gamma$ S binding and  $\beta$ arrestin2-translocation assays at the human MOR and Figures 1B and S3 for the corresponding concentration response curves.

| Agonist    | Human MOR       |                | Mouse MOR            |                |                        |                |                        |                         |
|------------|-----------------|----------------|----------------------|----------------|------------------------|----------------|------------------------|-------------------------|
|            | cAMP (CHO)      |                | GTP $\gamma$ S (CHO) |                | GTP $\gamma$ S (brain) |                | $\beta$ arr2 (imaging) |                         |
|            | $EC_{50}$<br>nM | $E_{MAX}$<br>% | $EC_{50}$<br>nM      | $E_{MAX}$<br>% | $EC_{50}$<br>nM        | $E_{MAX}$<br>% | $EC_{50}$<br>nM        | $E_{MAX}$<br>%          |
| DAMGO      | 5.2 $\pm$ 0.6   | 100            | 34 $\pm$ 2.1         | 100            | 400 $\pm$ 33           | 100            | 170 $\pm$ 13           | 100                     |
| Sufentanil | 0.03 $\pm$ 0.01 | 100 $\pm$ 1    | 2.7 $\pm$ 0.3        | 82 $\pm$ 1     | 4.8 $\pm$ 1.7          | 32 $\pm$ 3     | 1.0 $\pm$ 0.2          | 85 $\pm$ 7              |
| Fentanyl   | 0.54 $\pm$ 0.11 | 98 $\pm$ 2     | 87 $\pm$ 11          | 82 $\pm$ 1     | 170 $\pm$ 64           | 33 $\pm$ 3     | 31 $\pm$ 4.8           | 93 $\pm$ 4              |
| SR-11501   | 7.9 $\pm$ 0.81  | 98 $\pm$ 1     | 133 $\pm$ 12         | 73 $\pm$ 2     | 396 $\pm$ 68           | 38 $\pm$ 3     | 140 $\pm$ 23           | 81 $\pm$ 4              |
| Morphine   | 26 $\pm$ 3.9    | 97 $\pm$ 1     | 81 $\pm$ 7.4         | 82 $\pm$ 1     | 159 $\pm$ 19           | 41 $\pm$ 1     | 425 $\pm$ 51           | 37 $\pm$ 4              |
| SR-14969   | 14 $\pm$ 2.7    | 98 $\pm$ 2     | 40 $\pm$ 2.6         | 94 $\pm$ 1     | 159 $\pm$ 30           | 93 $\pm$ 10    | 891 $\pm$ 72           | 89 $\pm$ 5              |
| SR-14968   | 7.2 $\pm$ 0.75  | 100 $\pm$ 2    | 11 $\pm$ 1.2         | 96 $\pm$ 1     | 26 $\pm$ 1.8           | 91 $\pm$ 3     | 628 $\pm$ 207          | 91 $\pm$ 3              |
| SR-15098   | 110 $\pm$ 13    | 103 $\pm$ 1    | 230 $\pm$ 35         | 70 $\pm$ 1     | 219 $\pm$ 24           | 41 $\pm$ 3     | >10,000                | 17 $\pm$ 5 <sup>a</sup> |
| SR-15099   | 75 $\pm$ 15     | 101 $\pm$ 2    | 212 $\pm$ 22         | 70 $\pm$ 1     | 180 $\pm$ 27           | 34 $\pm$ 3     | >10,000                | 12 $\pm$ 6 <sup>a</sup> |
| SR-17018   | 76 $\pm$ 11     | 105 $\pm$ 3    | 193 $\pm$ 29         | 72 $\pm$ 1     | 288 $\pm$ 60           | 37 $\pm$ 4     | >10,000                | 11 $\pm$ 6 <sup>a</sup> |

<sup>a</sup>percent of maximum stimulation at the 10  $\mu$ M concentration is presented rather than  $E_{MAX}$ .

**Table S3. Related to Figure 2. Percent free compound concentrations in mouse plasma.**

Plasma protein binding was performed to determine the % free for each compound by equilibrium dialysis. C57BL/6J mice were treated with 6 mg/kg, i.p. as indicated (1 mg/kg for fentanyl) and the total plasma concentration was determined by LC/MS 1 hour after treatment (15 minutes for fentanyl, due to its shorter half-life). The estimated free concentration was then calculated. Mean  $\pm$  S.E.M. (n = 3-9). See *also*: Figure 2 for the concentration of compounds in plasma over time.

| Agonist      | % Free | Plasma Concentration (nM) |                |
|--------------|--------|---------------------------|----------------|
|              |        | Total                     | Estimated Free |
| Fentanyl (1) | 11     | 46 $\pm$ 6.6              | 5              |
| SR-11501 (6) | 4.7    | 427 $\pm$ 104             | 20             |
| Morphine (6) | 72     | 575 $\pm$ 71              | 414            |
| SR-14969 (6) | 5.5    | 2206 $\pm$ 499            | 121            |
| SR-14968 (6) | 3.2    | 2080 $\pm$ 156            | 67             |
| SR-15098 (6) | 5.6    | 4191 $\pm$ 87             | 235            |
| SR-15099 (6) | 8.9    | 2274 $\pm$ 374            | 202            |
| SR-17018 (6) | 4.6    | 1704 $\pm$ 558            | 78             |

**Table S4. Related to Table 3 and Figures 3 and S4. Number of animals used.** The number of C57BL/6J and MOR-KO animals used (*n*) for both the antinociception and respiration assays. Two animals were removed from the analysis of the respiratory assays for SR-11501 (48 mg/kg) due to mortality and are not counted here. See *a/so*: Table 3 for ED<sub>50</sub> values, Figures 3 and S4 for in vivo responses.

| Agonist  | Antinociception |        | Respiration |        |
|----------|-----------------|--------|-------------|--------|
|          | C57BL/6J        | MOR-KO | C57BL/6J    | MOR-KO |
| Fentanyl | 6-7             | 4      | 6-8         | 7      |
| SR-11501 | 5-6             | 5      | 4-8         | 7      |
| Morphine | 7-14            | 5      | 6-15        | 9      |
| SR-14969 | 5               | 5      | 4-6         | 7      |
| SR-14968 | 5-7             | 5      | 4-6         | 7      |
| SR-15098 | 8-9             | 5      | 10-13       | --     |
| SR-15099 | 5-17            | 5      | 10-13       | --     |
| SR-17018 | 5-6             | 6      | 8           | --     |

**Table S5. Related to Figure 4 and Tables 2 and 3. Correlation of bias factors derived from different *in vitro* assays to therapeutic windows calculated from different combinations of *in vivo* responses.** Bias factors representing G protein signaling over  $\beta$ arrestin2 recruitment calculated from the indicated assays were plotted against therapeutic windows calculated for different animal tests ( $ED_{50}$  respiration/  $ED_{50}$  antinociception). The  $R^2$  values from the linear regression analysis are provided. Abbreviations: CHO cells (*CHO*), mouse brainstem (*brain*), human MOR (*hMOR*), mouse MOR (*mMOR*), hot plate (*HP*), tail flick (*TF*), % arterial oxygen saturation ( $O_2$ ), breath rate (*BR*). See also: Figure 4 for graphical bias correlation of first entry; Table 2 for bias factors and Table 3 for therapeutic windows.

| MOR species | Bias Factor from:    |                         | Therapeutic Window from: |           |        |        |
|-------------|----------------------|-------------------------|--------------------------|-----------|--------|--------|
|             | G protein assay      | $\beta$ arrestin2 assay | $O_2$ /HP                | $O_2$ /TF | BR/HP  | BR/TF  |
| hMOR        | CHO-GTP $\gamma$ S   | EFC                     | 0.9589                   | 0.8639    | 0.8001 | 0.7969 |
| hMOR        | CHO-cAMP             | EFC                     | 0.9525                   | 0.9454    | 0.5209 | 0.6619 |
| mMOR        | CHO-GTP $\gamma$ S   | Imaging                 | 0.8805                   | 0.6802    | 0.7150 | 0.6800 |
| mMOR        | Brain-GTP $\gamma$ S | Imaging                 | 0.8277                   | 0.6413    | 0.8537 | 0.8088 |
